# Supplementary material
Source: publisher figshare collection journal article supplement (https://geolsoc.figshare.com/ndownloader/files/5426669)
Supplement: Supplementary file 1 [file 5426669]

Table 5. Rb-Sr analytical data,,,,,,,
Sample (stop),87Rb/86Sr,± (%),87Sr/86Sr,± (%),Age (Ma),± (Ma),
Chuacús complex,,,,,,,
5CO-4b Wr,3.646,1,0.7948,0.05,Wm 63.5,5.2,
5CO-4b Pl,4.338,1,0.79482,0.01,,,
"5CO-4b Wm1, 2min, W1",159.775,1,0.93532,0.05,,,
"G11s(G30), Bt 10min",413.033,1,1.10289,0.05,Bt 67.4,0.7,
"G11s(G30), Pl",0.952,1,0.70819,0.02,,,
"5PB-9b, Wr",38.255,1,0.80174,0.03,Wm 76.5,0.59,
"5PB-9b, Wm3, 2 min, W1",527.228,1,1.33388,0.07,,,
"5PB-9b, Wm6, 2 min, W2",393.719,1,1.18754,0.07,,,
"5PB-13b, Pl",0.069,1,0.70913,0.01,Wm 63.6,2.4,
"5PB-13b, Wm 2min",2.899,1,0.7117,0.01,,,
"5PB-13b, Wm4, 10min, W1",3.032,1,0.71171,0.03,,,
"5CO-5b, Wr",0.056,1,0.70861,0.01,Wm 76.1,1.5,
"5CO-5b, Ms1, 2min, W1",4.952,1,0.7139,0.01,,,
"5CO-5b, Ms2+4, 2min, W2",4.088,1,0.713,0.02,,,
"5CO-6b, Wr",0.545,1,0.70938,0.02,Wm 56.6,8,
"5CO-6b, Kfs",0.242,1,0.70898,0.02,,,
"5CO-6b, Wm2, 2min, W1",30.81,1,0.73454,0.07,,,
"5CO-6b, Wm4, 2min, W2",33.569,1,0.73504,0.07,,,
"885A, Wr",1.029763,1,0.709764,0.0005,Wm 65.2,1.4,
"885A, Wm, 1.0A",1.750590,1,0.710431,0.0005,,,
"885A, Wm, 1.2A",1.867765,1,0.71054,0.0005,,,
"885A, Wm, 0.8A",1.949947,1,0.710672,0.0005,,,
Metasomatized southern Chuacús complex,,,,,,,
"5C-36a, Wr",0.14,1,0.70576,0.01,Bt 35,14,
"5C-36a, Pl",0.09,1,0.7056,0.01,,,
5C-36a Bt 10min,7.562,1,0.70936,0.01,,,
"860B, Wr",2.847707,1,0.706266,0.0005,Wm 63,17,
"860B, Wm, 065A",3.101435,1,0.706552,0.0005,,,
"860B, Wm, 085A",0.329555,1,0.704046,0.0005,,,
Las Ovejas complex,,,,,,,
"5C-28b, Wr",3.944,1,0.71209,0.01,Wm 20.7,3.1,
5C-28b. Pl,1.422,1,0.71087,0.01,,,
"5C-28b, Wm 10min",65.791,1,0.7293,0.01,,,
"5C-28b, Wm2, 10min, W2",73.754,1,0.73293,0.01,,,
"5C-28b, Kfs",8.906,1,0.7145,0.01,Kfs 34.2,1,
"5C-37e, Wr",2.257,1,0.71298,0.05,Wm 33.7,1.6,
"5C-37e, Pl",2.243,1,0.71335,0.01,,,
"5C-37e, Kfs",2.348,1,0.71338,0.01,,,
"5C-37e Wm, 2min",73.269,1,0.74719,0.07,,,
"5H-2c, Wr",4.439,1,0.71896,0.01,Wm 23.7,0.3,
"5H-2c, Pl",3.501,1,0.71848,0.01,,,
"5H-2c, Kfs",5.082,1,0.71914,0.01,,,
"5H-2c, Wm, 1.5min",64.26,1,0.73751,0.02,,,
"5H-2c, Wm, 2min",67.998,1,0.73853,0.02,,,
"5H-2a, Bio 10min",215.869,1,0.75908,0.03,Bt 16.2,2.1,
"5H-2a, Wr",8.204,1,0.71153,0.01,Wm 21.8,0.4,
"5H-2a, Pl",4.857,1,0.71027,0.03,,,
"5H-2a, Wm, 10min",222.159,1,0.78344,0.05,,,
"5H-9a, Wr",1.775,1,0.71548,0.01,Wm 162,11,
"5H-9a, Pl",0.294,1,0.71207,0.05,,,
"5H-9a, Wm, 2min",6.817,1,0.72728,0.01,,,
"5H-9a, Wm1, 2min, W1",7.934,1,0.72906,0.04,,,
"5H-9a, Wm2, 2min, W2",9.125,1,0.73272,0.02,,,
"5H-9a, Bt, 2min",36.279,1,0.7827,0.01,,,
"5H-9a, Bt4, 2min, W1",50.248,1,0.80718,0.02,Bt 135,8,
Abbreviations see Table 2. Ages are mineral isochrons in Ma. Sample specifications.,,,,,,,
"include various grinding times, grain-size, and magnetic fractions.",,,,,,,
,,,,,,,
,,,,,,,
,,,,,,,
,,,,,,,
,,,,,,,
,,,,,,,
,,,,,,,
,,,,,,,
,,,,,,,
,,,,,,,
,,,,,,,
,,,,,,,
,,,,,,,
,,,,,,,
,,,,,,,
,,,,,,,
,,,,,,,
,,,,,,,
,,,,,,,
,,,,,,,
,,,,,,,
,,,,,,,
,,,,,,,
,,,,,,,
,,,,,,,
,,,,,,,
,,,,,,,
,,,,,,,
,,,,,,,
,,,,,,,
,,,,,,,
,,,,,,,
,,,,,,,
,,,,,,,
,,,,,,,
,,,,,,,
,,,,,,,
,,,,,,,
,,,,,,,
,,,,,,,
,,,,,,,
,,,,,,,
,,,,,,,
,,,,,,,
,,,,,,,
,,,,,,,
,,,,,,,
,,,,,,,
,,,,,,,
,,,,,,,
,,,,,,,
,,,,,,,
,,,,,,,
,,,,,,,
,,,,,,,
,,,,,,,
,,,,,,,
,,,,,,,
,,,,,,,
,,,,,,,
,,,,,,,
,,,,,,,
,,,,,,,
,,,,,,,
,,,,,,,
,,,,,,,
,,,,,,,
,,,,,,,
,,,,,,,
,,,,,,,
,,,,,,,
,,,,,,,
,,,,,,,
,,,,,,,
,,,,,,,
,,,,,,,
,,,,,,,
,,,,,,,
